# Supplementary material for: Evaluation of Microcirculation in Optic Nerve Head Using Laser Speckle Flowgraphy in Active Thyroid Eye Disease
Source: Hindawi journal article supplement (doi:10.1155/2022/9115270), 2022-01-01

**Supplemental Fig. 1**

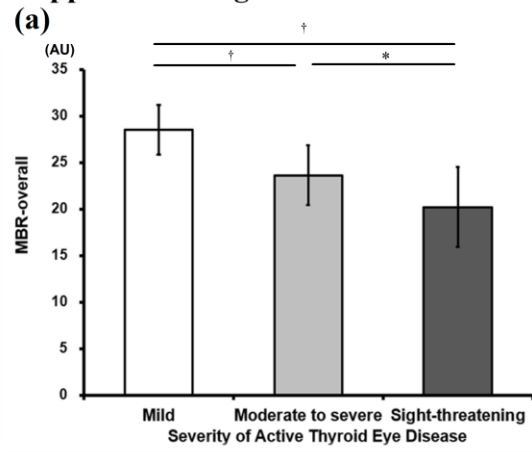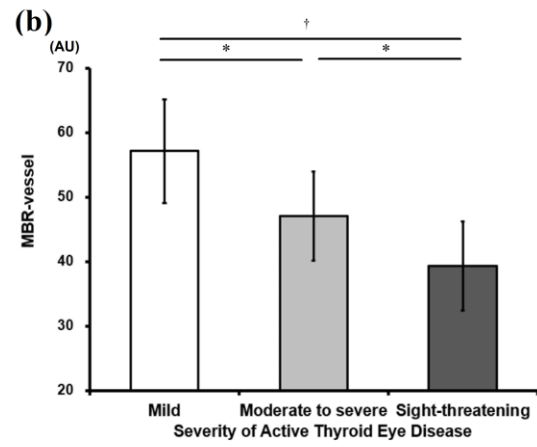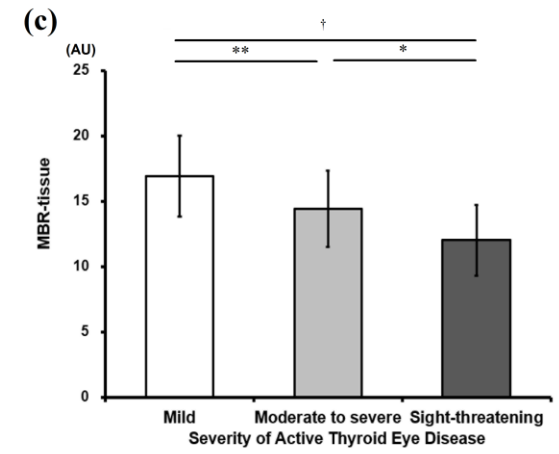

Supplement: f1 [file 9115270.f1.pdf]
