# Supplementary material for: Evaluation of Microcirculation in Optic Nerve Head Using Laser Speckle Flowgraphy in Active Thyroid Eye Disease
Source: Hindawi journal article supplement (doi:10.1155/2022/9115270), 2022-01-01
Supplement: f2 [file 9115270.f2.pdf]

SUPPLEMENTAL TABLE 1. SPEARMAN'S RANK CORRELATION COEFFICIENT BETWEEN CLINICAL PARAMETERS AND MBR

| MBR         | Age     | SBP    | DBP    | MAP     | OPP    | HR    | BCVA<br>(logMAR) | IOP (primary gaze) | IOP (upper gaze) |
|-------------|---------|--------|--------|---------|--------|-------|------------------|--------------------|------------------|
| MBR-overall | -0.217  | -0.253 | -0.003 | -0.321* | -0.180 | 0.195 | -0.066           | -0.193             | -0.134           |
| MBR-vessel  | -0.342* | -0.212 | 0.105  | -0.273  | -0.201 | 0.137 | -0.135           | -0.121             | -0.048           |
| MBR-tissue  | -0.168  | -0.105 | -0.114 | -0.254  | -0.134 | 0.139 | -0.106           | -0.222             | -0.075           |

\* $p < 0.05$

BCVA, best-corrected visual acuity; bpm, beats per minutes; DBP, diastolic blood pressure; HR, heart rate; logMAR, logarithm of the minimum angle of resolution; IOP, intraocular pressure; MAP, mean arterial pressure; MBR, mean blur rate; mmHg, millimeter of mercury; MOPP, mean ocular perfusion pressure; SBP, systolic blood pressure; SD, standard deviation
