# Supplementary material for: Evaluation of Microcirculation in Optic Nerve Head Using Laser Speckle Flowgraphy in Active Thyroid Eye Disease
Source: Hindawi journal article supplement (doi:10.1155/2022/9115270), 2022-01-01
Supplement: f3 [file 9115270.f3.pdf]

SUPPLEMENTAL TABLE 2. CLINICAL CHARACTERISTICS AND MBR IN AGE-MATCHED ACTIVE THYROID EYE DISEASE GROUP

|                                                           | <i>Mild</i>  | <i>Moderate to severe</i> | <i>Sight-threatening</i> | <i>p value</i> |
|-----------------------------------------------------------|--------------|---------------------------|--------------------------|----------------|
| No. of eyes, n (%)                                        | 7            | 7                         | 7                        |                |
| Age, years, mean (SD)                                     | 47.4 (8.0)   | 48.5 (8.0)                | 46.7 (8.9)               | 0.915          |
| Gender, male (%)                                          | 2 (28.6)     | 3 (42.9)                  | 4 (57.1)                 | 0.854          |
| Smoking, n (%)                                            | 1 (14.3)     | 4 (57.1)                  | 1 (14.3)                 | 0.260          |
| History of high-dose intravenous steroid treatment, n (%) | 2 (28.6)     | 4 (57.1)                  | 5 (71.4)                 | 0.285          |
| History of orbital decompression, eyes (%)                | 0 (0)        | 0 (0)                     | 1 (14.3)                 | >0.999         |
| Systemic findings                                         |              |                           |                          |                |
| SBP, mmHg, mean (SD)                                      | 121.1 (19.2) | 147 (32.9)                | 129.3 (13.3)             | 0.133          |
| DBP, mmHg, mean (SD)                                      | 80.1 (8.4)   | 91 (18.6)                 | 78.4 (12.8)              | 0.214          |
| MAP, mmHg, mean (SD)                                      | 93.8 (11.6)  | 109.9 (22.1)              | 95.4 (12.4)              | 0.147          |
| MOPP, mmHg, mean (SD)                                     | 45.9 (8.7)   | 53.3 (16.6)               | 43.9 (7.3)               | 0.308          |
| HR, bpm, mean (SD)                                        | 69.0 (14.1)  | 66.9 (4.7)                | 63.0 (7.2)               | 0.503          |
| Ocular findings                                           |              |                           |                          |                |
| BCVA (logMAR), mean (SD)                                  | 0.09 (0.16)  | 0.06 (0.07)               | 0.03 (0.04)              | 0.922          |
| IOP (primary gaze), mean (SD), mmHg                       | 16.0 (4.2)   | 19.8 (4.5)                | 20.6 (4.5)               | 0.137          |
| IOP (upward gaze), mean (SD), mmHg                        | 18.4 (4.8)   | 25.5 (5.2)                | 24.0 (6.4)               | 0.063          |
| MBR, mean (SD)                                            |              |                           |                          |                |
| MBR-overall                                               | 27.7 (3.0)   | 22.9 (3.3)                | 20.1 (3.0)               | 0.001*         |
| MBR-vessel                                                | 54.8 (9.4)   | 47.1 (7.2)                | 41.7 (7.9)               | 0.026*         |
| MBR-tissue                                                | 16.3 (3.2)   | 13.2 (2.7)                | 12.3 (1.9)               | 0.030*         |

\* $p < 0.05$

BCVA, best-corrected visual acuity; bpm, beats per minutes; DBP, diastolic blood pressure; HR, heart rate; logMAR, logarithm of the minimum angle of resolution; IOP, intraocular pressure; MAP, mean arterial pressure; MBR, mean blur rate; mmHg, millimeter of mercury; MOPP, Mean ocular perfusion pressure; SBP, systolic blood pressure; SD, standard deviation
